# Supplementary material
Source: PubMed Central journal article supplement (PMC6456544)
Supplement: ajtr0011-1884-f8.pdf [file ajtr0011-1884-f8.pdf]

Astaxanthin prevents against lipopolysaccharide-induced acute lung injury and sepsis

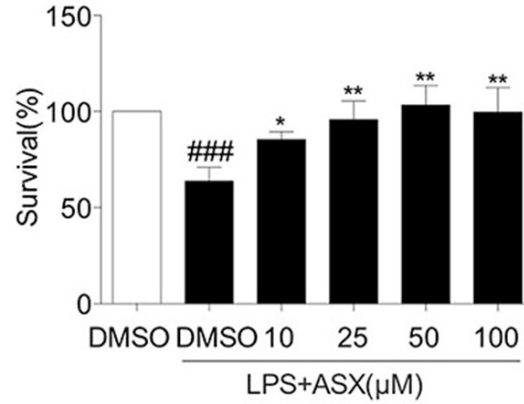

**Figure S1.** ASX significantly decreased LPS-induced apoptotic cells in Raw264.7. Cells were incubated with different concentrations of ASX for 1 h and treated with LPS (500 ng/ml) for 24 h. Cell viability was determined by MTT assay.

Analysis for Figure 4A

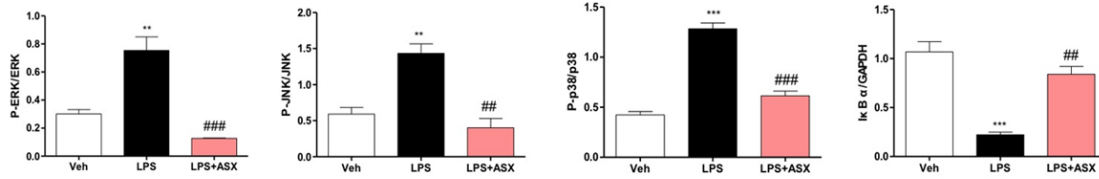

Analysis for Figure 4B

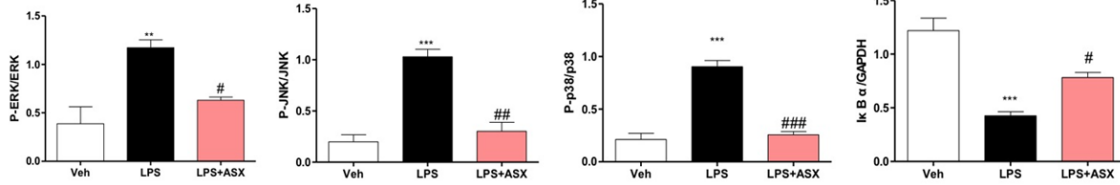

Analysis for Figure 7

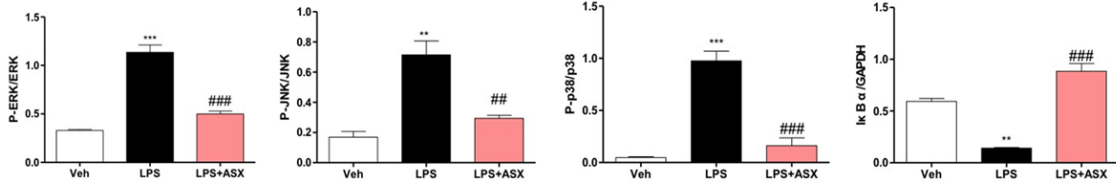

**Figure S2.** Quantification of the immunoblots for Figures 4A, 4B and 7.

Astaxanthin prevents against lipopolysaccharide-induced acute lung injury and sepsis

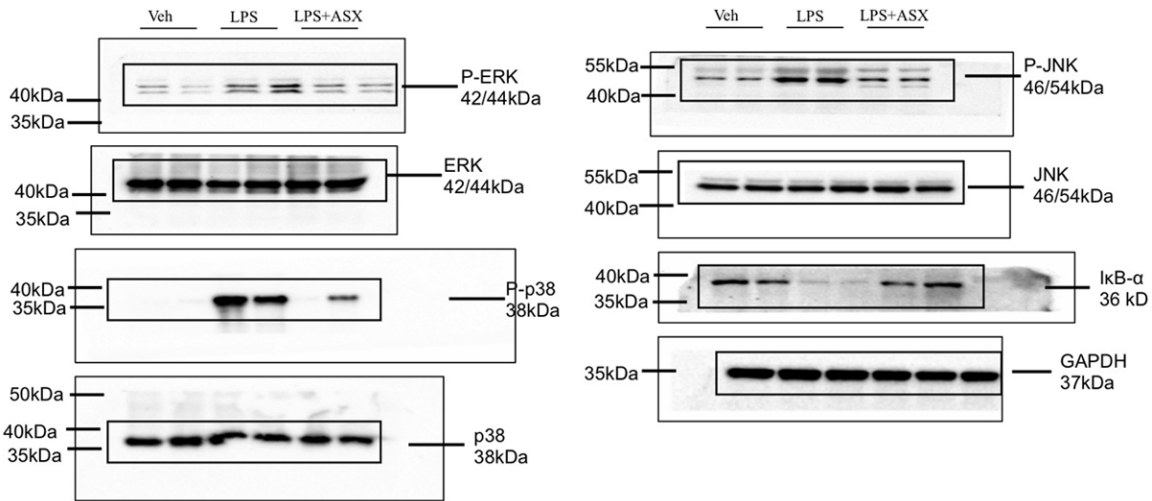

Figure S3. Original images for all relevant western blots in Figure 4A.

Analysis for Figure 4B

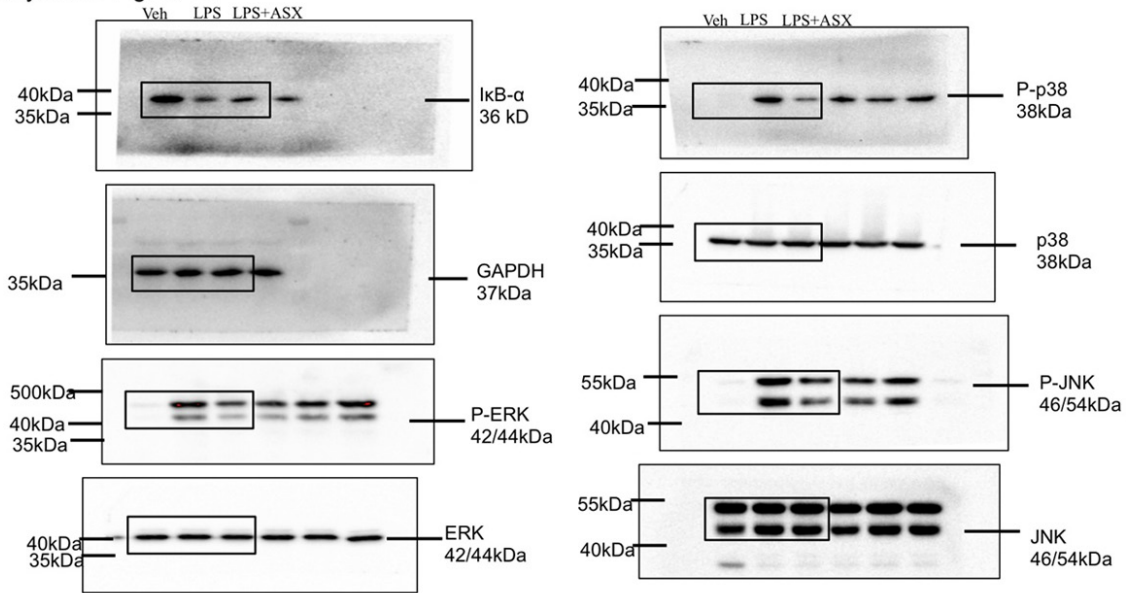

Analysis for Figure 4C

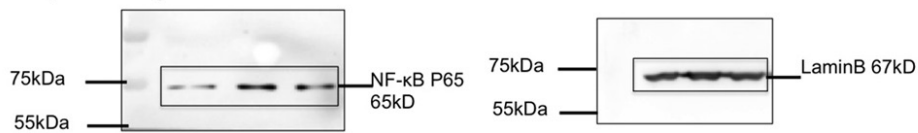

Analysis for Figure 4D

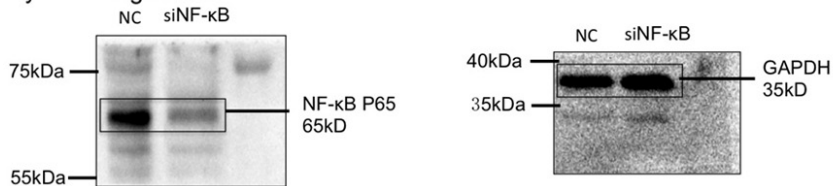

Figure S4. Original images for all relevant western blots in Figure 4B-D.

# Astaxanthin prevents against lipopolysaccharide-induced acute lung injury and sepsis

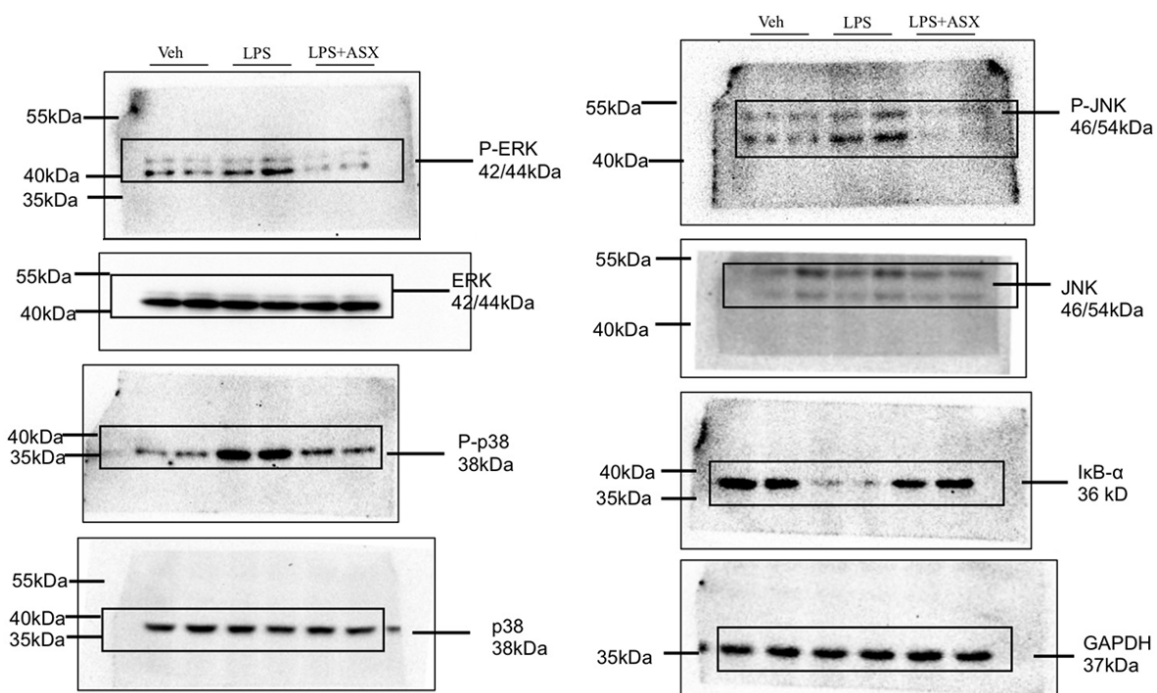

Figure S5. Original images for all relevant western blots in Figure 7.
